# Supplementary material
Source: publisher figshare collection journal article supplement (https://future-science-group.figshare.com/articles/dataset/_/21353463)
Supplement: Supplementary file 1 [file 1]

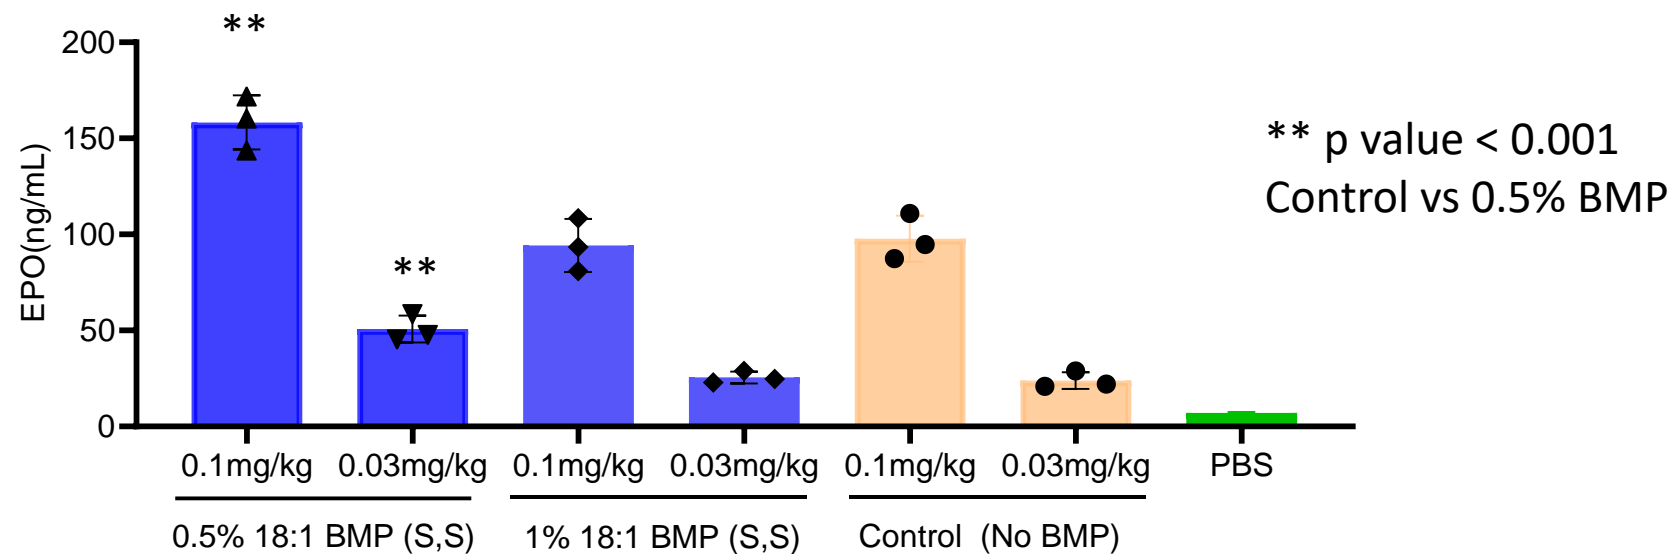

Supplemental Figure 2: In vivo human erythropoietin (hEPO) mRNA expression assay. Balb/C mice were injected intravenous with 0.5% and 1% BMP containing LNPs, control LNP containing hEPO mRNA and PBS at a dose of 0.1 and 0.03 mg/kg. hEPO expression values are presented as mean  $\pm$  standard error. n=3 per group. \*\* P value < 0.001.
