# Supplementary material
Source: publisher figshare collection journal article supplement (https://future-science-group.figshare.com/articles/dataset/_/21353463)
Supplement: Supplementary file 2 [file 1]

Supplemental Figure 1: Structures of different BMP lipids

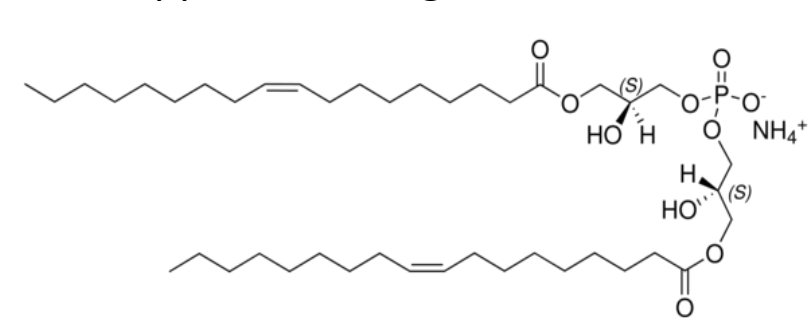

18:1 BMP (S,S)

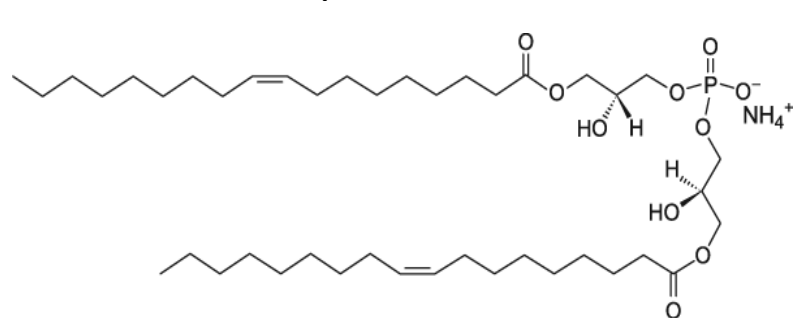

18:1 BMP (R,R)

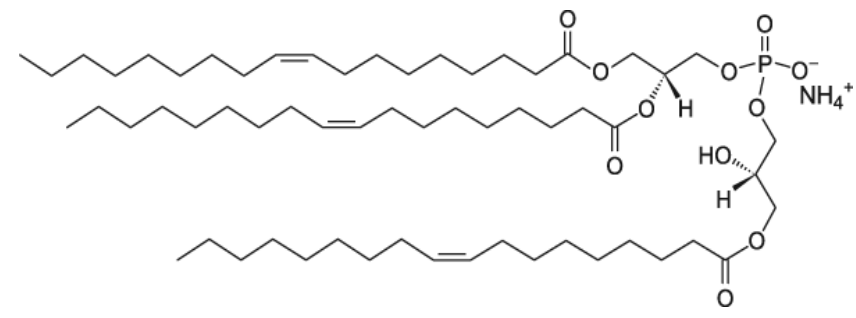

18:1 Hemi BMP (S,R)

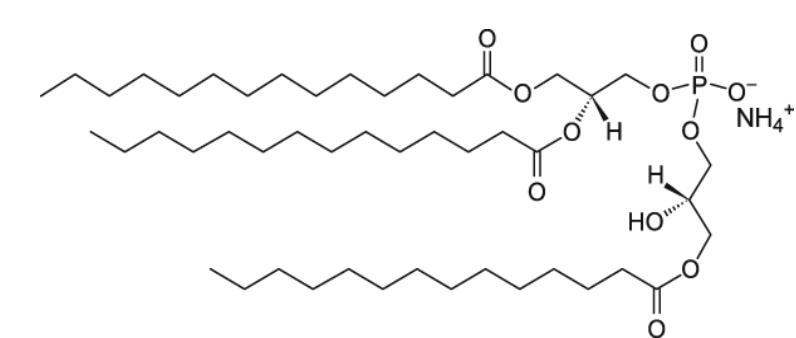

14:0 Hemi BMP (S,R)

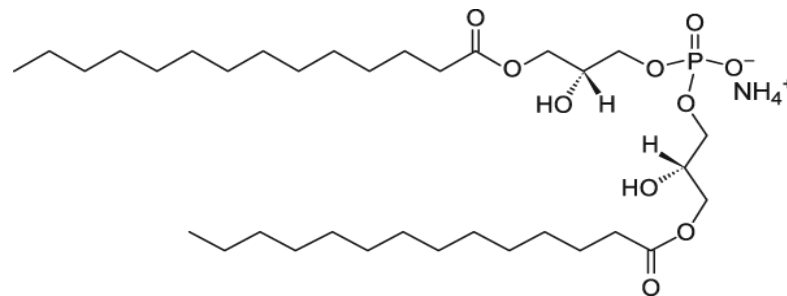

14:0 BMP (S,R)

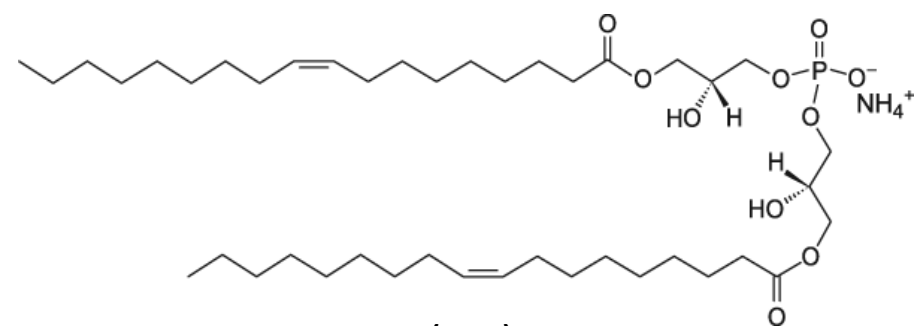

18:1 BMP (S,R)

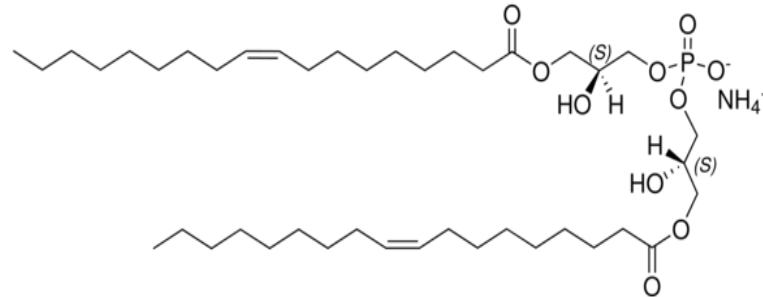

2',2' 18:1 BMP (S,S)
